# Supplementary material
Source: publisher site journal article supplement (https://www.dovepress.com/article/401934)
Supplement: Supplementary file 1 [file get_supplementary_file.php]

Supplementary Material

# Supplementary Table

**Table S1 Factors associated with anxiety in psoriasis**

| **Variables** | **Anxiety** | | | |
| --- | --- | --- | --- | --- |
| **OR (95%CI)** | ***p*** | **AOR (95%CI) a** | ***p*** |
| Female | 1.243(0.721-2.142) | 0.434 | 1.263(0.717-2.225) | 0.419 |
| Duration of psoriasis | 1.027(0.997-1.058) | 0.080 | 1.009(0.976-1.042) | 0.606 |
| PASI | 1.028(1.001-1.056) | 0.041 | 1.012(0.982-1.042) | 0.453 |
| DLQI | 1.100(1.042-1.162) | 0.001 | 1.087(1.024-1.154) | 0.006 |

a Adjusted for sex, duration of psoriasis, PASI, and DLQI.

Abbreviations: PASI, Psoriasis Area and Severity Index; DLQI, Dermatology Life Quality Index; OR, unadjusted odds ratio; AOR, adjusted odds ratio; CI, confidence interval.
